# Supplementary material for: A new 2,2′:6′,2′′-terpyridine-based ligand and its complexes: structures, photophysical properties and DFT calculations to evaluate the halogen effect on the TPA
Source: Royal Society of Chemistry journal article supplement (doi:10.1039/c2ce25467k), 2012-01-01
Supplement: c2ce25467k.pdf [file c2ce25467k.pdf]

## Supporting Information

### A novel 2,2':6',2''-terpyridine-based ligand and its complexes: Structures, Photophysical properties and DFT calculations to evaluate the halogen effect on the TPA

5 Fei-Xia Zhou, Zheng Zheng, Hong-Ping Zhou,\* Wei-Zai Ke, Jian-Qing Wang, Zhi-Peng Yu, Feng Jin, Jia-Xiang Yang, Jie-Ying Wu and Yu-Peng Tian

*Department of Chemistry, Anhui University and Key Laboratory of Functional Inorganic Materials Chemistry of Anhui Province, 230039 Hefei, P. R. China.*

E-mail: zhpzhp@263.net

#### 10 Structure of complexes 2, 4, 5 and 8.

**Structure of [CdLBr<sub>2</sub>]<sub>2</sub>·CHCl<sub>3</sub> (Complex 2):** Complex 2 crystallizes in the monoclinic form with space group *P2(1)/c*. As shown in **Fig. S1a**, complex 2 exhibits quite distorted trigonal bipyramidal geometry. The Cd(II) atom locates in a five coordination environment chelating with two bromine atoms and three N atoms from one ligand. Also the unit consists of two CdLBr<sub>2</sub> and one 15 chloroform. Selected bond lengths and angles are listed in **Table S1**.

From **Fig. S1a**, the weak force of C-H···Br and C-H··· $\pi$  staking interactions are widely spread in the complex to construct this super molecular structure ( $d(\text{C90-H90}\cdots\text{Br7}) = 2.811 \text{ \AA}$  and angle to be  $141.91^\circ$ ,  $d(\text{C34-H34}\cdots\pi) = 3.218 \text{ \AA}$ ).

**Fig. S2a** shows that the chloroform molecules play a significant role in forming hydrogen bonds 20 and other molecular interactions, such as: (1) C-H···Cl bonds ( $d(\text{C15-H15}\cdots\text{Cl2}) = 2.949 \text{ \AA}$  and angle to be  $134.73^\circ$ ,  $d(\text{C33-H33}\cdots\text{Cl3}) = 2.817 \text{ \AA}$  and angle to be  $177.29^\circ$ ). (2) Br···Cl bond ( $d(\text{Br8}\cdots\text{Cl3}) = 3.559 \text{ \AA}$ ).<sup>1</sup> (4) C-H···Br bond ( $d(\text{C125-H125}\cdots\text{Br2}) = 2.949 \text{ \AA}$  and angle to be  $163.40^\circ$ ). Besides the weak force of C-H···Br interactions is widely spread in the complex to construct this super molecular structure ( $d(\text{C32-H32}\cdots\text{Br8}) = 2.973 \text{ \AA}$  and angle to be  $138.57^\circ$ ).

25 Also as shown in **Fig. S2b**, it is the chloroform molecules that bridged the surrounding moieties together to construct the whole supermolecular structure by forming hydrogen bonds and the other molecular interactions such as: (1) C-H···Cl bond ( $d(\text{C2-H2}\cdots\text{Cl6}) = 2.780 \text{ \AA}$  and angle to be  $173.68^\circ$ ). (2) Br···Cl bond ( $d(\text{Br5}\cdots\text{Cl6}) = 3.564 \text{ \AA}$ ).<sup>1</sup> (3) C126-Cl4··· $\pi$  staking interactions ( $d = 3.356 \text{ \AA}$ ).<sup>1</sup> (4) C-H···Br bond ( $d(\text{C126-H126}\cdots\text{Br4}) = 2.666 \text{ \AA}$  and angle to be  $150.62^\circ$ ). The 30 weak force of C-H···Br interactions is the dominant effect on the formation of the supramolecule ( $d(\text{C1-H1}\cdots\text{Br5}) = 2.844 \text{ \AA}$ , angle to be  $136.80^\circ$ ,  $d(\text{C66-H66}\cdots\text{Br6}) = 2.941 \text{ \AA}$ , angle to be  $158.04$

$^{\circ}$ ,  $d(\text{C80-H80}\cdots\text{Br6}) = 2.963 \text{ \AA}$  and angle to be  $161.52^{\circ}$ ).

Seen along  $a$ -axis in **Fig. S1b**, the triazole ring is not directly involved in coordination, but the lone pair electrons from the N atom still have a strong Pro-e-competence, which generates a 1-D 'w' chain through C-H $\cdots$ N hydrogen bonds ( $d(\text{C65-H65}\cdots\text{N17}) = 2.559 \text{ \AA}$  and angle to be  $176.085^{\circ}$ ).

Complex **2** forms a 2-D structure through classical C-H $\cdots$ Br hydrogen bond interactions ( $d(\text{C80-H80}\cdots\text{Br6}) = 2.963 \text{ \AA}$ , angle to be  $161.52^{\circ}$ ,  $d(\text{C43-H43}\cdots\text{Br3}) = 2.792 \text{ \AA}$  and angle to be  $154.97^{\circ}$ ), and C-H $\cdots$  $\pi$  interactions ( $d(\text{C34-H34}\cdots\pi) = 3.218 \text{ \AA}$ ) between the neighboring dimers along  $c$ -axis (**Fig. S1c**).

10 Finally, the extended 3-D supermolecular structures are formed along the  $b$ -axis *via* C-H $\cdots$ N hydrogen bond interactions ( $d(\text{C85-H85}\cdots\text{N6}) = 2.660 \text{ \AA}$ , angle to be  $149.85^{\circ}$ ,  $d(\text{C57-H57}\cdots\text{N24}) = 2.730 \text{ \AA}$  and angle to be  $150.21^{\circ}$ ) and C-H $\cdots$ Br hydrogen bond interactions ( $d(\text{C1-H1}\cdots\text{Br5}) = 2.844 \text{ \AA}$  and angle to be  $136.80^{\circ}$ ). (**Fig. S1d**).

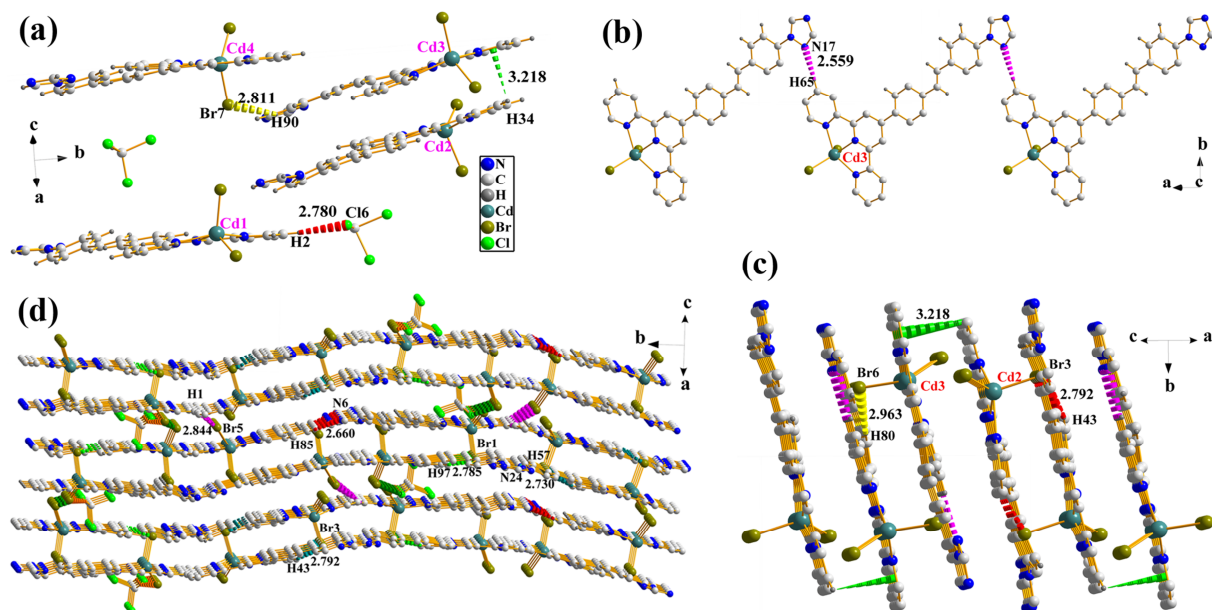

15 **Fig. S1** (a) Coordination environments of Cd with the atom numbering scheme; (b) The 1-D chain structure of complex **2** showing the C-H $\cdots$ N interactions along the  $a$ -axis; (c) The 2-D structure of complex **2** showing C-H $\cdots$ Br and C-H $\cdots$  $\pi$  interactions along the  $c$ -axis; (d) The 3-D supermolecular structure of complex **2** showing the C-H $\cdots$ N and C-H $\cdots$ Br interactions along the  $b$ -axis.

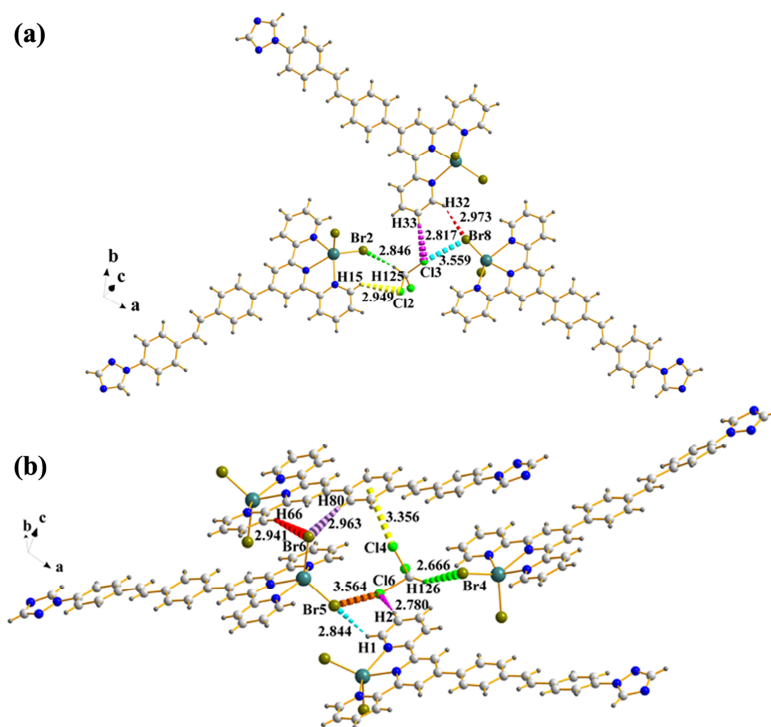

**Fig. S2** Weak interactions form solvent in complex **2**.

**Structure of  $[\text{CdLI}_2]_2 \cdot \text{CH}_2\text{Cl}_2$  (Complex 4):** Complex **4** is in distorted trigonal bipyramidal geometry as well as complex **2** (**Fig. S3**). The packing of the molecules is also very similar, except that complex **4** used  $\text{CdI}_2$  instead of  $\text{CdBr}_2$ . However, different from complex **2**, there has one dichloromethane in the unit. **Fig. S3a**, shows that the weak force of  $\text{C-H} \cdots \text{I}$  hydrogen bonds (H from free dichloromethane molecule and I from coordination compound,  $d(\text{C63-H63A} \cdots \text{I1}) = 3.248 \text{ \AA}$  and angle to be  $164.597(883)^\circ$ ) and  $\pi \cdots \pi$  staking interactions ( $d = 3.337 \text{ \AA}$ ) are widely spread in the unit.

10 Seen along the *c*-axis in **Fig. S3b**, complex **4** generates a 1-D staircase through  $\text{C-H} \cdots \text{Cl}$  hydrogen bonds ( $d(\text{C44-H44} \cdots \text{N11}) = 2.680 \text{ \AA}$ , angle to be  $172.25^\circ$ ,  $d(\text{C48-H48} \cdots \text{I2}) = 3.037 \text{ \AA}$ , angle to be  $155.77^\circ$ ,  $d(\text{C43-H43} \cdots \text{I2}) = 2.987 \text{ \AA}$  and angle to be  $160.13^\circ$ ). Contributed by another  $\text{C-H} \cdots \text{I}$  hydrogen bonds ( $d(\text{C28-H28} \cdots \text{I2}) = 3.128 \text{ \AA}$ , angle to be  $159.00^\circ$ ,  $d(\text{C31-H31} \cdots \text{I2}) = 3.134 \text{ \AA}$ , angle to be  $158.17^\circ$ ,  $d(\text{C58-H58} \cdots \text{I3}) = 2.976 \text{ \AA}$  and angle to be  $163.49^\circ$ ), a 2-D wave type structure is produced along *b*-axis (**Fig. S3c**). Finally, the extended 3-D supermolecular structures are formed along the *a*-axis via  $\pi \cdots \pi$  staking interactions with the shortest distance of  $3.176 \text{ \AA}$  (red dashed line) (**Fig. S3d**).

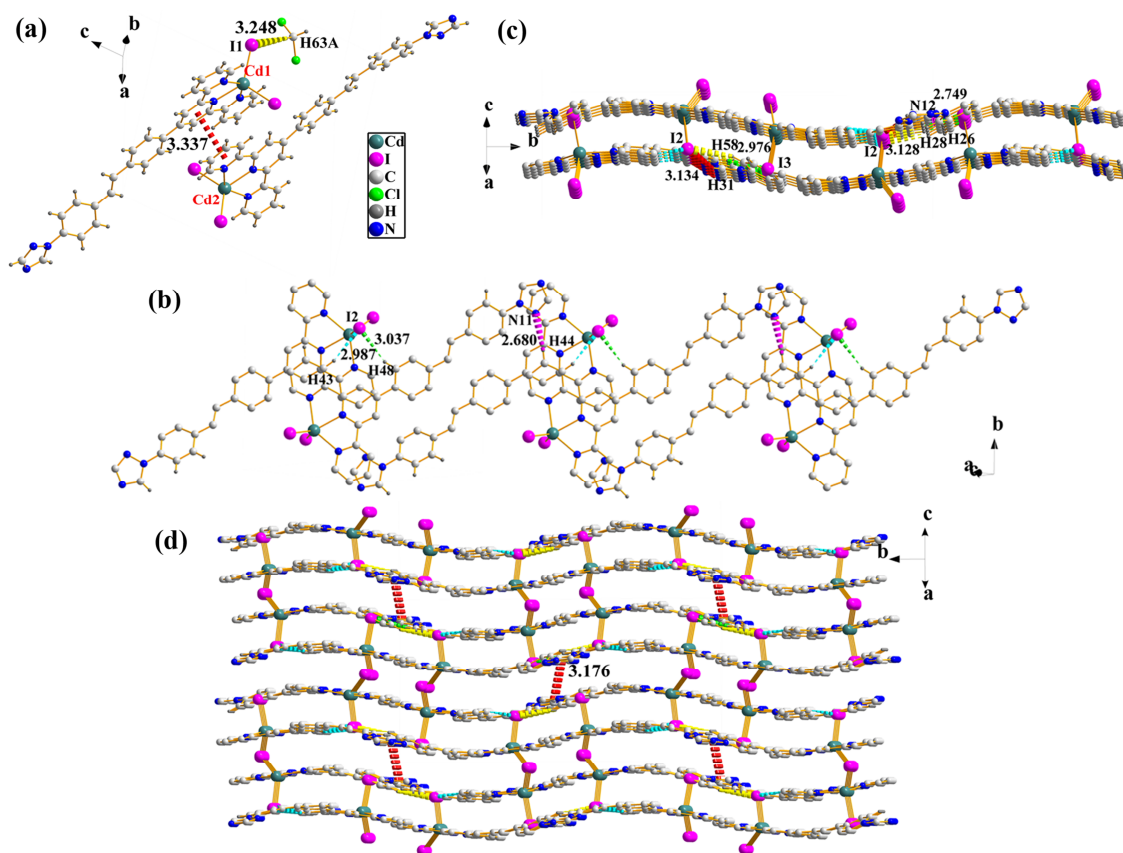

**Fig. S3** (a) Coordination environments of Cd with the atom numbering scheme; (b) The 1-D staircase structure of complex **4** showing the C–H···Cl interactions along the *c*-axis; (c) The 2-D structure of complex **4** showing the C–H···I interactions along the *b*-axis; (d) The 3-D supermolecular structure of complex **4** showing  $\pi \cdots \pi$  interactions along the *a*-axis.

**Structure of  $\text{ZnL}(\text{NCS})_2 \cdot \text{CHCl}_3$  (Complex **5**):** Complex **5** adopts the same coordination mode as complexes **2**, **3** and **4**. It crystallizes in the monoclinic form with space group  $P2(1)/n$  as shown in **Table 1**. However, different from **2**, **3** and **4**, **5** contains two  $\text{ZnL}(\text{NCS})_2$  and two chloroform molecules. From **Table S1**, it can be seen that the S–C–N bond angles are  $176.6(15)$  and  $10178.6(12)^\circ$ , i.e., the  $\text{SCN}^-$  group is almost perfectly linear. The S–C and C–N distances of 1.578 (1.611) and 1.094 (1.147) Å in  $\text{SCN}^-$  indicate a  $\pi$ -delocalization along the metal–thiocyanate chains.<sup>2</sup> This observation is consistent with the fact that the  $\text{SCN}^-$  ligand is easily polarizable ( $^-\text{S}=\text{C}\equiv\text{N}\leftrightarrow\text{S}=\text{C}=\text{N}^-$ ). Besides, with IR characterization, the absorption peak at lower wave numbers ( $2080\text{ cm}^{-1}$ ) was assigned to  $\nu(\text{N}=\text{C}=\text{S})$  of the thiocyanate in complex **5**, suggesting a 15 different binding mode in accordance with the results of X-ray analysis. **Fig. S4a** presents the functions of chloroform molecules in generating the final complex through the following interactions: (1) C–H···Cl bond ( $d(\text{C}69\text{--H}69\cdots\text{Cl}2) = 2.976\text{ \AA}$  and angle to be  $171.10^\circ$ ). (2) C–H···S bond with the distance of  $\text{C}90\text{--H}90\cdots\text{S}4$  is  $2.856\text{ \AA}$  and angle to be  $143.81^\circ$ . (3) C–Cl··· $\pi$



staging interactions ( $d(\text{C104}-\text{Cl6}\cdots\pi) = 3.361 \text{ \AA}$  and  $d(\text{C104}-\text{Cl4}\cdots\pi) = 3.448 \text{ \AA}$ ).<sup>1</sup> The weak force of  $\text{C}-\text{H}\cdots\text{S}$  within the complex constructs the supramolecule ( $d(\text{C28}-\text{H28}\cdots\text{S4}) = 2.976 \text{ \AA}$  and angle to be  $172.68^\circ$ ).

Herein, we used  $\text{Zn}(\text{SCN})_2$  instead of  $\text{CdI}_2$ , there are not only the anions, but also the metal cations are different, however, the packing of the molecules is very similar. Through  $\text{C}-\text{H}\cdots\text{N}$  ( $d(\text{C67}-\text{H67}\cdots\text{N10}) = 2.747 \text{ \AA}$  and angle to be  $173.69^\circ$ ) and  $\text{C}-\text{H}\cdots\text{S}$  hydrogen bonds ( $d(\text{C66}-\text{H66}\cdots\text{S1}) = 2.933 \text{ \AA}$  and angle to be  $168.00^\circ$ ), **5** forms into a 1-D chain along *c*-axis as seen from **Fig. S4b**. Due to an additional further  $\text{C}-\text{H}\cdots\pi$  interactions ( $d = 2.719 \text{ \AA}$ ) and  $\text{Cl}\cdots\text{Cl}$  bond interactions<sup>1</sup> ( $d(\text{Cl1}\cdots\text{Cl5}) = 3.498 \text{ \AA}$ ), a 2-D structure is produced along *a*-axis. Finally (**Fig. S4c**), 10 complex **5** forms a stable 3-D supermolecular structure through  $\text{C}-\text{H}\cdots\text{S}$  hydrogen bonds ( $d(\text{C4}-\text{H4}\cdots\text{S1}) = 2.893 \text{ \AA}$ , angle to be  $171.75^\circ$ ,  $d(\text{C64}-\text{H64}\cdots\text{S3}) = 2.884 \text{ \AA}$ , angle to be  $136.56^\circ$ ,  $d(\text{C46}-\text{H46}\cdots\text{S4}) = 2.994 \text{ \AA}$  and angle to be  $163.31^\circ$ ) along *b*-axis (**Fig. S4d**).

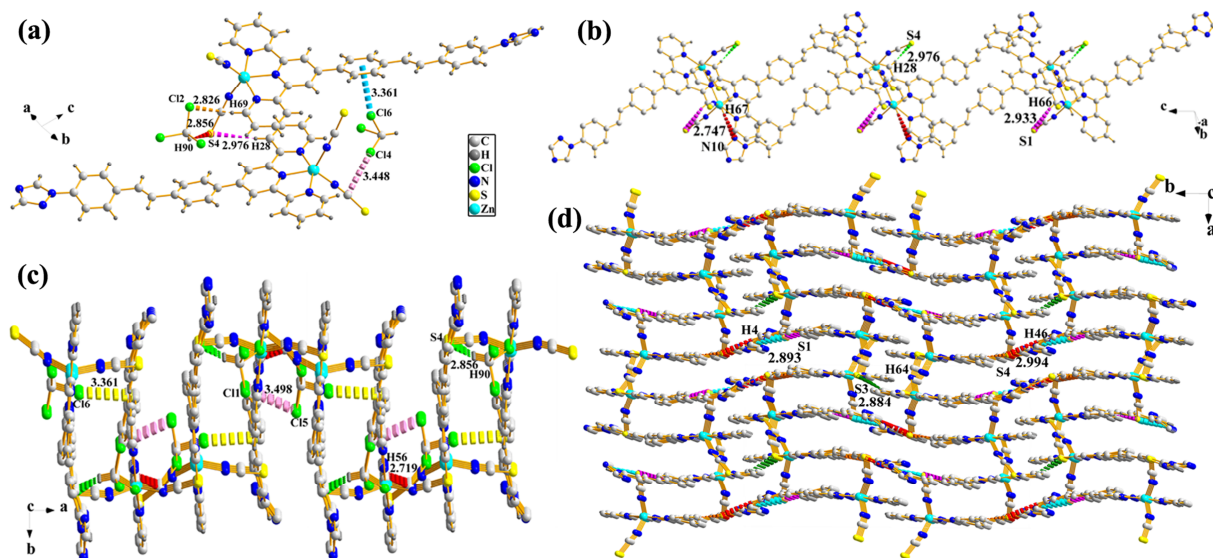

**Fig. S4** (a) Coordination environments of Zn with the atom numbering scheme and weak interactions form solvent in complex **5**; (b) The 1-D chain structure of complex **5** showing the  $\text{C}-\text{H}\cdots\text{N}$  and  $\text{C}-\text{H}\cdots\text{S}$  interactions along the *c*-axis; (c) The 2-D structure of complex **5** showing the  $\text{C}-\text{H}\cdots\pi$  and  $\text{Cl}\cdots\text{Cl}$  interactions along the *a*-axis; (d) The 3-D supermolecular structure of complex **5** showing the  $\text{C}-\text{H}\cdots\text{S}$  interactions along the *b*-axis.

**Structure of  $[\text{CdL}_2](\text{ClO}_4)_2\cdot\text{CH}_3\text{OH}$  (Complex **8**):** Complex **8** adopts the same coordination mode as complex **7**. The  $\text{Cd}(\text{II})$  coordinates with two ligands and two perchlorate ions are free. As shown in **Fig. S5a**, the weak force of  $\text{O}-\text{H}\cdots\text{O}$  (O from free perchlorate ions and H from methanol) is widely spread in the complex to construct this super molecular structure ( $d(\text{O1S}-\text{H1SA}\cdots\text{O4}) = 2.087 \text{ \AA}$  and angle to be  $153.71^\circ$ ).

Similar to **complex 7**, the free perchlorate ions has a dominant effect indicating by the following interactions: (1)  $d(\text{C1-H1}\cdots\text{O1}) = 2.719 \text{ \AA}$  and angle to be  $161.17^\circ$ . (2)  $d(\text{C43-H43}\cdots\text{O1}) = 2.549 \text{ \AA}$  and angle to be  $171.80^\circ$ . (3)  $d(\text{C2-H2}\cdots\text{O2}) = 2.577 \text{ \AA}$  and angle to be  $137.46^\circ$ . (4)  $d(\text{C30-H30}\cdots\text{O2}) = 2.565 \text{ \AA}$  and angle to be  $138.58^\circ$ . (5)  $d(\text{C35-H35}\cdots\text{O3}) = 2.573 \text{ \AA}$  and angle to be  $147.72^\circ$ . (6)  $d(\text{C48-H48}\cdots\text{O3}) = 2.688 \text{ \AA}$  and angle to be  $175.95^\circ$ . (7)  $d(\text{C52-H52}\cdots\text{O4}) = 2.519 \text{ \AA}$  and angle to be  $173.11^\circ$ . (8)  $d(\text{O1S-H1SA}\cdots\text{O4}) = 2.087 \text{ \AA}$  and angle to be  $153.71^\circ$ . (9)  $d(\text{C12-H12}\cdots\text{O5}) = 2.638 \text{ \AA}$  and angle to be  $\text{C12-H12-O5}$  is  $127.28^\circ$ . (10)  $d(\text{C32-H32}\cdots\text{O5}) = 2.431 \text{ \AA}$  and angle to be  $141.24^\circ$ . (11)  $d(\text{C56-H56}\cdots\text{O6}) = 2.625 \text{ \AA}$  and angle to be  $126.86^\circ$ . (12)  $d(\text{C62-H62}\cdots\text{O6}) = 2.278 \text{ \AA}$  and angle to be  $172.04^\circ$ . (13)  $d(\text{C46-H46}\cdots\text{O7}) = 2.667 \text{ \AA}$  and angle to be  $123.96^\circ$ . (14)  $d(\text{C21-H21}\cdots\text{O8}) = 2.649 \text{ \AA}$  and angle to be  $168.01^\circ$ . The supramolecule was formed by the weak force of C-H $\cdots$ O hydrogen bonds (O from methanol,  $d(\text{C34-H34}\cdots\text{O1S}) = 2.666 \text{ \AA}$  and angle to be  $155.94^\circ$ ). (**Fig. S6**)

Seen along the *b*-axis in **Fig. S5b**, complex **8** generates a 1-D chain through C-H $\cdots$  $\pi$  staking interactions ( $d(\text{C34-H34}\cdots\pi) = 3.358 \text{ \AA}$  and  $d(\text{C44-H44}\cdots\pi) = 3.176 \text{ \AA}$ ). Due to an additional further C-H $\cdots$  $\pi$  staking interactions ( $d(\text{C17-H17}\cdots\pi) = 2.966 \text{ \AA}$  and  $d(\text{C49-H49}\cdots\pi) = 2.993 \text{ \AA}$ ) along *a*-axis, a 2-D structure is produced (**Fig. S5c**). Finally, complex **8** forms a stable 3-D supermolecular structure through C-H $\cdots$ N interactions ( $d(\text{C28-H28}\cdots\text{N9}) = 2.664 \text{ \AA}$  and angle to be  $132.50^\circ$ ,  $d(\text{C12-H12}\cdots\text{N17}) = 2.692 \text{ \AA}$  and angle to be  $162.63^\circ$ ) along *c*-axis (**Fig. S5d**).

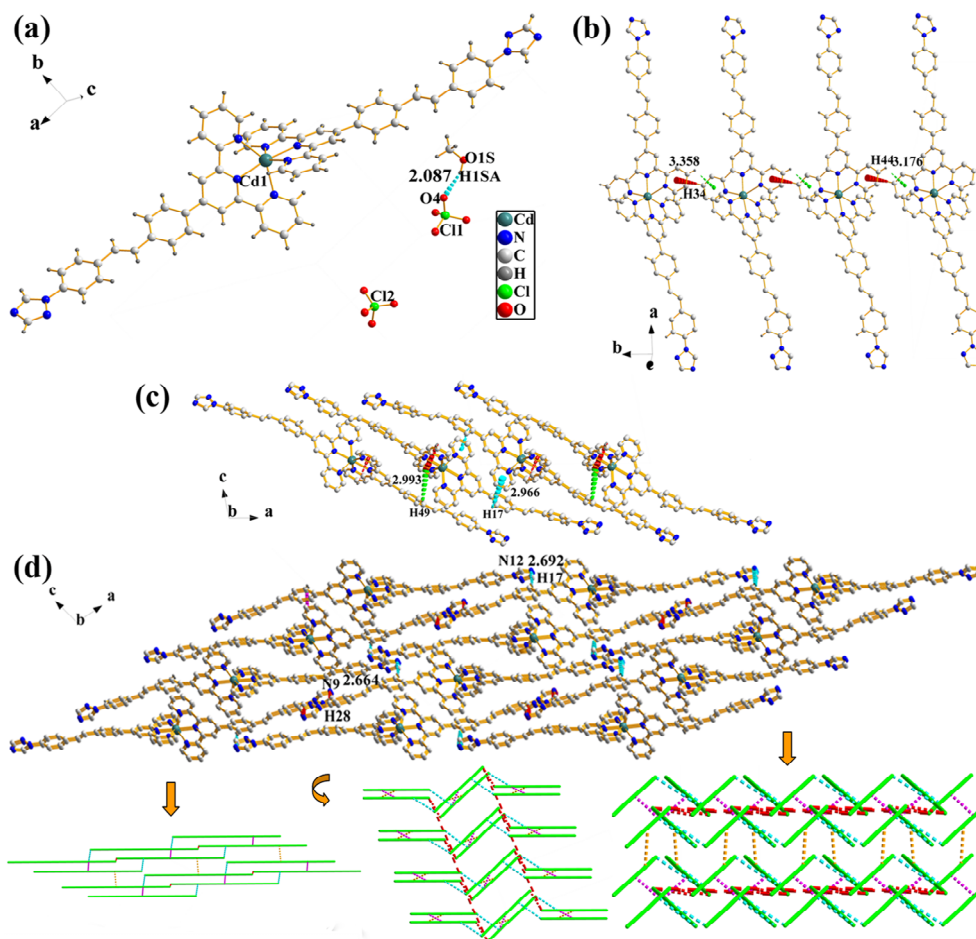

**Fig. S5** (a-c) Coordination environments of Cd with the atom numbering scheme; (d) The 1-D framework of complex **8** showing C-H... $\pi$  interactions along the *b*-axis; (e) The 2-D structure of complex **8** showing C-H... $\pi$  interactions bonds along the *a*-axis; (f) The 3-D supermolecular structure of complex **8** showing the C-H...N hydrogen bond along the *c*-axis.

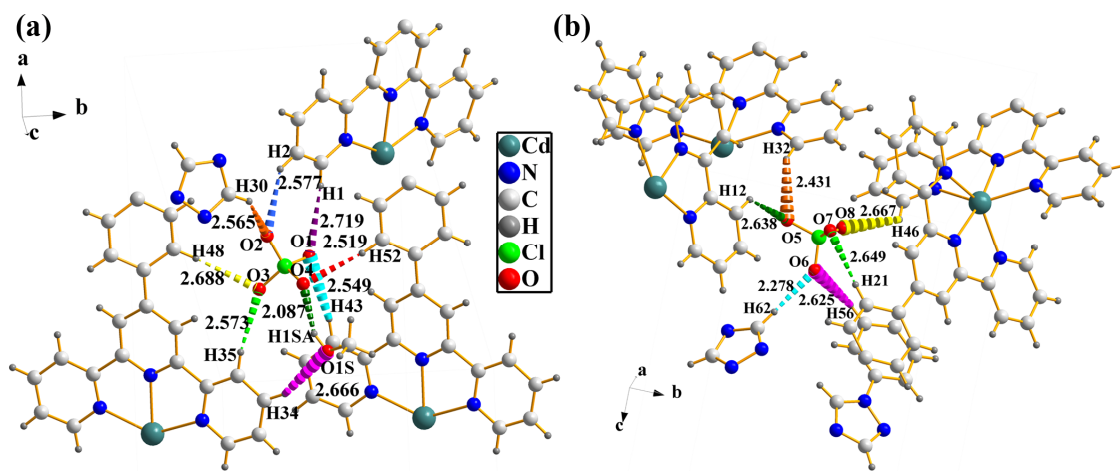

**Fig. S6** Weak interactions form free perchlorate ions and methanol in complex **8**.

**Table S1.** Selected Bond Lengths (Å) and Angles (°) for **2-5** and **7, 8**.

| <b>[CdLBr<sub>2</sub>]<sub>2</sub>·CHCl<sub>3</sub> (2)</b>                           |             |             |             |             |             |             |             |
|---------------------------------------------------------------------------------------|-------------|-------------|-------------|-------------|-------------|-------------|-------------|
| Cd1-N1                                                                                | 2.381(9)    | Cd1-N2      | 2.394(8)    | Cd1-N3      | 2.363(8)    | Cd1-Br1     | 2.6640(22)  |
| Cd1-Br2                                                                               | 2.4317(19)  | Cd2-N7      | 2.408(10)   | Cd2-N8      | 2.366(8)    | Cd2-N9      | 2.382(9)    |
| Cd2-Br3                                                                               | 2.6391(21)  | Cd2-Br4     | 2.4173(22)  | Cd3-N13     | 2.341(9)    | Cd3-N14     | 2.374(8)    |
| Cd3-N15                                                                               | 2.309(10)   | Cd3-Br5     | 2.3966(24)  | Cd3-Br6     | 2.6984(24)  | Cd4-N19     | 2.365(9)    |
| Cd4-N20                                                                               | 2.332(8)    | Cd4-N21     | 2.376(9)    | Cd4-Br7     | 2.6835(25)  | Cd4-Br8     | 2.3933(24)  |
| N1-Cd1-N2                                                                             | 68.3(3)     | N1-Cd1-N3   | 135.0(3)    | N2-Cd1-N3   | 67.9(3)     | Br1-Cd1-Br2 | 105.26(7)   |
| N7-Cd2-N8                                                                             | 68.0(3)     | N7-Cd2-N9   | 135.7(3)    | N8-Cd2-N9   | 69.1(3)     | Br3-Cd2-Br4 | 104.25(8)   |
| N13-Cd3-N14                                                                           | 67.3(3)     | N13-Cd3-N15 | 135.9(3)    | N14-Cd3-N15 | 69.2(3)     | Br5-Cd3-Br6 | 119.95(8)   |
| N19-Cd4-N20                                                                           | 68.9(3)     | N19-Cd4-N21 | 137.8(3)    | N20-Cd4-N21 | 69.3(3)     | Br7-Cd4-Br8 | 123.26(8)   |
| <b>ZnLI<sub>2</sub> (3)</b>                                                           |             |             |             |             |             |             |             |
| Zn1-N1                                                                                | 2.1542(84)  | Zn1-N2      | 2.0894(74)  | Zn1-N3      | 2.2103(80)  | Zn1-I1      | 2.5889(21)  |
| Zn1-I2                                                                                | 2.6155(19)  | N1-Zn1-N2   | 75.0(3)     | N2-Zn1-N3   | 73.6(3)     | N1-Zn1-N3   | 148.7(3)    |
| I1-Zn1-I2                                                                             | 119.70(5)   |             |             |             |             |             |             |
| <b>[CdLI<sub>2</sub>]<sub>2</sub>·CH<sub>2</sub>Cl<sub>2</sub> (4)</b>                |             |             |             |             |             |             |             |
| Cd1-N1                                                                                | 2.3829(55)  | Cd1-N2      | 2.3355(41)  | Cd1-N3      | 2.3801(51)  | Cd1-I1      | 2.7334(9)   |
| Cd1-I2                                                                                | 2.7686(10)  | Cd2-N7      | 2.3657(54)  | Cd2-N8      | 2.3215(50)  | Cd2-N9      | 2.3760(52)  |
| Cd2-I3                                                                                | 2.7544(10)  | Cd2-I4      | 2.7355(10)  | N1-Cd1-N2   | 69.08(18)   | N1-Cd1-N3   | 137.72(19)  |
| N2-Cd1-N3                                                                             | 68.78(19)   | I1-Cd1-I2   | 112.74(2)   | N7-Cd2-N8   | 69.74(19)   | N7-Cd2-N9   | 137.54(19)  |
| N8-Cd2-N9                                                                             | 68.4(2)     | I3-Cd2-I4   | 125.40(3)   |             |             |             |             |
| <b>ZnL(NCS)<sub>2</sub>·CHCl<sub>3</sub> (5)</b>                                      |             |             |             |             |             |             |             |
| Zn1-N4                                                                                | 2.0783(92)  | Zn1-N5      | 2.2032(83)  | Zn1-N6      | 2.1753(100) | Zn1-N7      | 1.9994(86)  |
| Zn1-N8                                                                                | 1.9346(140) | Zn2-N12     | 2.0677(93)  | Zn2-N13     | 2.1630(87)  | Zn2-N14     | 2.2083(82)  |
| Zn2-N15                                                                               | 1.9709(162) | Zn2-N16     | 1.9499(98)  | N7-C32      | 1.1276(131) | C32-S1      | 1.5936(108) |
| N8-C33                                                                                | 1.1184(200) | C33-S2      | 1.6333(159) | N15-C70     | 1.0936(243) | C70-S3      | 1.578(21)   |
| N16-C71                                                                               | 1.1472(147) | C71-S4      | 1.6107(113) | N4-Zn1-N5   | 74.8(3)     | N4-Zn1-N6   | 74.9(3)     |
| N4-Zn1-N7                                                                             | 122.9(4)    | N4-Zn1-N8   | 128.9(4)    | N5-Zn1-N6   | 149.7(3)    | N5-Zn1-N7   | 95.6(4)     |
| N5-Zn1-N8                                                                             | 101.1(4)    | N6-Zn1-N7   | 101.3(4)    | N6-Zn1-N8   | 97.3(4)     | N7-Zn1-N8   | 108.2(4)    |
| N12-Zn1-N13                                                                           | 76.1(3)     | N12-Zn1-N14 | 74.9(3)     | N12-Zn1-N15 | 125.9(4)    | N12-Zn1-N16 | 122.3(4)    |
| N13-Zn1-N14                                                                           | 150.8(3)    | N13-Zn1-N15 | 101.4(4)    | N13-Zn1-N16 | 102.5(4)    | N14-Zn1-N15 | 93.4(4)     |
| N14-Zn1-N16                                                                           | 95.4(4)     | N15-Zn1-N16 | 111.1(5)    | C32-N7-Zn1  | 171.9(10)   | N7-C32-S1   | 175.6(12)   |
| C33-N8-Zn1                                                                            | 166.0(12)   | N8-C33-S2   | 174.5(11)   | C70-N15-Zn2 | 160.7(13)   | N15-C70-S3  | 176.6(15)   |
| C71-N16-Zn2                                                                           | 156.2(9)    | N16-C71-S3  | 178.6(12)   |             |             |             |             |
| <b>[ZnL<sub>2</sub>]<sub>2</sub>(ClO<sub>4</sub>)<sub>4</sub>·7H<sub>2</sub>O (7)</b> |             |             |             |             |             |             |             |
| Zn1-N1                                                                                | 2.183(4)    | Zn1-N2      | 2.065(4)    | Zn1-N3      | 2.194(4)    | Zn1-N7      | 2.206(4)    |
| Zn1-N8                                                                                | 2.064(4)    | Zn1-N9      | 2.170(4)    | Zn2-N13     | 2.194(4)    | Zn2-N14     | 2.071(4)    |
| Zn2-N15                                                                               | 2.187(4)    | Zn2-N19     | 2.186(5)    | Zn2-N20     | 2.057(4)    | Zn2-N21     | 2.189(4)    |
| Cl1-O1                                                                                | 1.366(7)    | Cl1-O2      | 1.332(7)    | Cl1-O3      | 1.355(9)    | Cl1-O4      | 1.457(8)    |
| Cl2-O5                                                                                | 1.390(5)    | Cl2-O6      | 1.415(5)    | Cl2-O7      | 1.420(5)    | Cl2-O8      | 1.385(5)    |
| Cl3-O9                                                                                | 1.361(10)   | Cl3-O10     | 1.269(7)    | Cl3-O11     | 1.368(9)    | Cl3-O17     | 1.223(9)    |
| Cl4-O12                                                                               | 1.316(8)    | Cl4-O13     | 1.36(1)     | Cl4-O14     | 1.58(2)     | Cl4-O15     | 1.333(7)    |
| N1-Zn1-N2                                                                             | 75.68(15)   | N1-Zn1-N3   | 150.81(15)  | N1-Zn1-N7   | 86.30(16)   | N1-Zn1-N8   | 102.99(15)  |
| N1-Zn1-N9                                                                             | 99.23(16)   | N2-Zn1-N3   | 75.41(15)   | N2-Zn1-N7   | 104.69(15)  | N2-Zn1-N8   | 178.67(15)  |

|                                                                            |             |             |            |             |               |              |             |
|----------------------------------------------------------------------------|-------------|-------------|------------|-------------|---------------|--------------|-------------|
| N2-Zn1-N9                                                                  | 104.04(15)  | N3-Zn1-N7   | 97.16(16)  | N3-Zn1-N8   | 105.91(15)    | N3-Zn1-N9    | 91.59(15)   |
| N7-Zn1-N8                                                                  | 75.13(15)   | N7-Zn1-N9   | 151.22(15) | N8-Zn1-N9   | 76.11(16)     | N13-Zn2-N14  | 75.34(16)   |
| N13-Zn2-N15                                                                | 151.20(15)  | N13-Zn2-N19 | 90.00(16)  | N13-Zn2-N20 | 101.46(16)    | N13-Zn2-N21  | 97.46(16)   |
| N14-Zn2-N15                                                                | 75.89(16)   | N14-Zn2-N19 | 105.05(16) | N14-Zn2-N20 | 176.62(17)    | N14-Zn2-N21  | 103.66(16)  |
| N15-Zn2-N19                                                                | 96.15(16)   | N15-Zn2-N20 | 107.34(15) | N15-Zn2-N21 | 90.55(16)     | N19-Zn2-N20  | 75.82(16)   |
| N19-Zn2-N21                                                                | 151.29(16)  | N20-Zn2-N21 | 75.52(16)  |             |               |              |             |
| <b>[CdL<sub>2</sub>](ClO<sub>4</sub>)<sub>2</sub>·CH<sub>3</sub>OH (8)</b> |             |             |            |             |               |              |             |
| Cd1-N1                                                                     | 2.3768(31)  | Cd1-N2      | 2.2895(32) | Cd1-N3      | 2.3426(30)    | Cd1-N4       | 2.3447(32)  |
| Cd1-N5                                                                     | 2.3074(33)  | Cd1-N6      | 2.3338(32) | Cl1-O1      | 1.4259(34)    | Cl1-O2       | 1.4293(45)  |
| Cl1-O3                                                                     | 1.3944(45)  | Cl1-O4      | 1.4214(37) | Cl2-O5      | 1.4176(44)    | Cl2-O6       | 1.3248(58)  |
| Cl2-O7                                                                     | 1.2709(109) | Cl2-O8      | 1.4048(96) | C1S-O1S     | 1.3353(150)   | O1S-H1SA     | 0.8518(659) |
| C1S-H1S1                                                                   | 0.9610(136) | C1S-H1S2    | 0.9601(97) | C1S-H1S3    | 0.9587(117)   | N1-Cd1-N2    | 69.58(11)   |
| N1-Cd1-N3                                                                  | 139.51(11)  | N1-Cd1-N4   | 82.53(11)  | N1-Cd1-N5   | 103.89(11)    | N1-Cd1-N6    | 104.46(12)  |
| N2-Cd1-N3                                                                  | 70.26(11)   | N2-Cd1-N4   | 102.17(11) | N2-Cd1-N5   | 170.86(10)    | N2-Cd1-N6    | 117.23(11)  |
| N3-Cd1-N4                                                                  | 110.88(11)  | N3-Cd1-N5   | 116.59(10) | N3-Cd1-N6   | 89.35(11)     | N4-Cd1-N5    | 70.1(1)     |
| N4-Cd1-N6                                                                  | 140.08(11)  | N5-Cd1-N6   | 70.08(10)  | O1-Cl1-O2   | 108.9(2)      | O1-Cl1-O3    | 110.8(3)    |
| O1-Cl1-O4                                                                  | 109.8(2)    | O2-Cl1-O3   | 107.6(2)   | O2-Cl1-O4   | 111.4(3)      | O3-Cl1-O4    | 108.3(3)    |
| O5-Cl1-O6                                                                  | 111.1(3)    | O5-Cl1-O7   | 114.9(4)   | O5-Cl1-O8   | 106.9(3)      | O6-Cl1-O7    | 113.2(5)    |
| O6-Cl1-O8                                                                  | 101.7(6)    | O7-Cl1-O8   | 107.9(7)   | O4-H1SA-O1S | 153.713(5680) | H1SA-O1S-C1S | 111.(6)     |

**Table S2.** Photophysical properties of complexes **L** and complexes **1-8** in several of different polar solvents.

| compd    | Solvents      | $\lambda_{\max}^{(1a)}$ [a] | $\lambda_{\max}^{(1f)}$ [b] | $\Phi$ [c] | $\Delta\nu$ [d] |
|----------|---------------|-----------------------------|-----------------------------|------------|-----------------|
| <b>L</b> | THF           | 286, 336                    | 408                         | 0.468963   | 5252            |
|          | ethyl acetate | 279, 327                    | 404                         | 0.549127   | 5829            |
|          | acetonitrile  | 284, 330                    | 412                         | 0.334894   | 6031            |
|          | DMF           | 283, 333                    | 420                         | 0.496245   | 6221            |
|          | methanol      | 285, 336                    | 424                         | 0.13953    | 6177            |
| <b>1</b> | THF           | 286, 344                    | 457                         | 0.485707   | 7188            |
|          | ethyl acetate | 284, 341                    | 457                         | 0.383932   | 7444            |
|          | acetonitrile  | 284, 337                    | 414, 497                    | 0.19454    | 9553            |
|          | DMF           | 280, 334                    | 420                         | 0.416786   | 6131            |
|          | methanol      | 288, 343                    | 514                         | 0.14775    | 9699            |
| <b>2</b> | THF           | 286, 336                    | 408                         | 0.3607     | 5252            |
|          | ethyl acetate | 283, 338                    | 456                         | 0.373757   | 7656            |



|          |               |          |     |          |       |
|----------|---------------|----------|-----|----------|-------|
|          | acetonitrile  | 284, 339 | 501 | 0.176857 | 9538  |
|          | DMF           | 293, 333 | 420 | 0.450756 | 6221  |
|          | methanol      | 292, 334 | 439 | 0.13523  | 7161  |
|          | THF           | 287, 336 | 407 | 0.53431  | 5192  |
|          | ethyl acetate | 289, 342 | 453 | 0.370705 | 7165  |
| <b>3</b> | acetonitrile  | 282, 335 | 505 | 0.136296 | 10049 |
|          | DMF           | 282, 332 | 421 | 0.350207 | 6368  |
|          | methanol      | 286, 334 | 514 | 0.084818 | 10485 |
|          | THF           | 290, 335 | 408 | 0.38953  | 5341  |
|          | ethyl acetate | 284, 342 | 447 | 0.059236 | 6868  |
| <b>4</b> | acetonitrile  | 287, 339 | 501 | 0.172327 | 9538  |
|          | DMF           | 281, 336 | 419 | 0.605807 | 5896  |
|          | methanol      | 287, 337 | 474 | 0.166962 | 8577  |
|          | THF           | 287, 336 | 471 | 0.421251 | 8530  |
|          | ethyl acetate | 286, 341 | 461 | 0.291445 | 7634  |
| <b>5</b> | acetonitrile  | 287, 340 | 507 | 0.197854 | 9688  |
|          | DMF           | 284, 338 | 419 | 0.478868 | 5719  |
|          | methanol      | 286, 337 | 510 | 0.118919 | 10066 |
|          | THF           | 284, 333 | 408 | 0.477366 | 5520  |
|          | ethyl acetate | 283, 336 | 406 | 0.440448 | 5131  |
| <b>6</b> | acetonitrile  | 284, 336 | 501 | 0.172571 | 9802  |
|          | DMF           | 278, 335 | 420 | 0.45057  | 6041  |
|          | methanol      | 285, 339 | 492 | 0.186848 | 9173  |
|          | THF           | 282, 337 | 408 | 0.397482 | 5164  |
|          | ethyl acetate | 285, 324 | 451 | 0.065433 | 8691  |
| <b>7</b> | acetonitrile  | 284, 335 | 415 | 0.272793 | 5754  |
|          | DMF           | 286, 342 | 419 | 0.58932  | 5373  |
|          | methanol      | 286, 338 | 424 | 0.447704 | 6001  |
| <b>8</b> | THF           | 283, 335 | 408 | 0.436318 | 5341  |

|               |          |     |          |      |
|---------------|----------|-----|----------|------|
| ethyl acetate | 288, 326 | 406 | 0.22053  | 6044 |
| acetonitrile  | 285, 336 | 415 | 0.275682 | 5666 |
| DMF           | 290, 339 | 420 | 0.498042 | 5689 |
| methanol      | 286, 335 | 426 | 0.234772 | 6377 |

[a] Peak position of the longest absorption band. [b] Peak position of SPEF, excited at the absorption maximum.

[c] Quantum yields determined by using quinine sulfate as standard. [d] Stokes' shift in  $\text{cm}^{-1}$

**Fig. S7** Linear absorption (left) and SPEF (right) spectra of complexes **2-8** in five organic solvents.

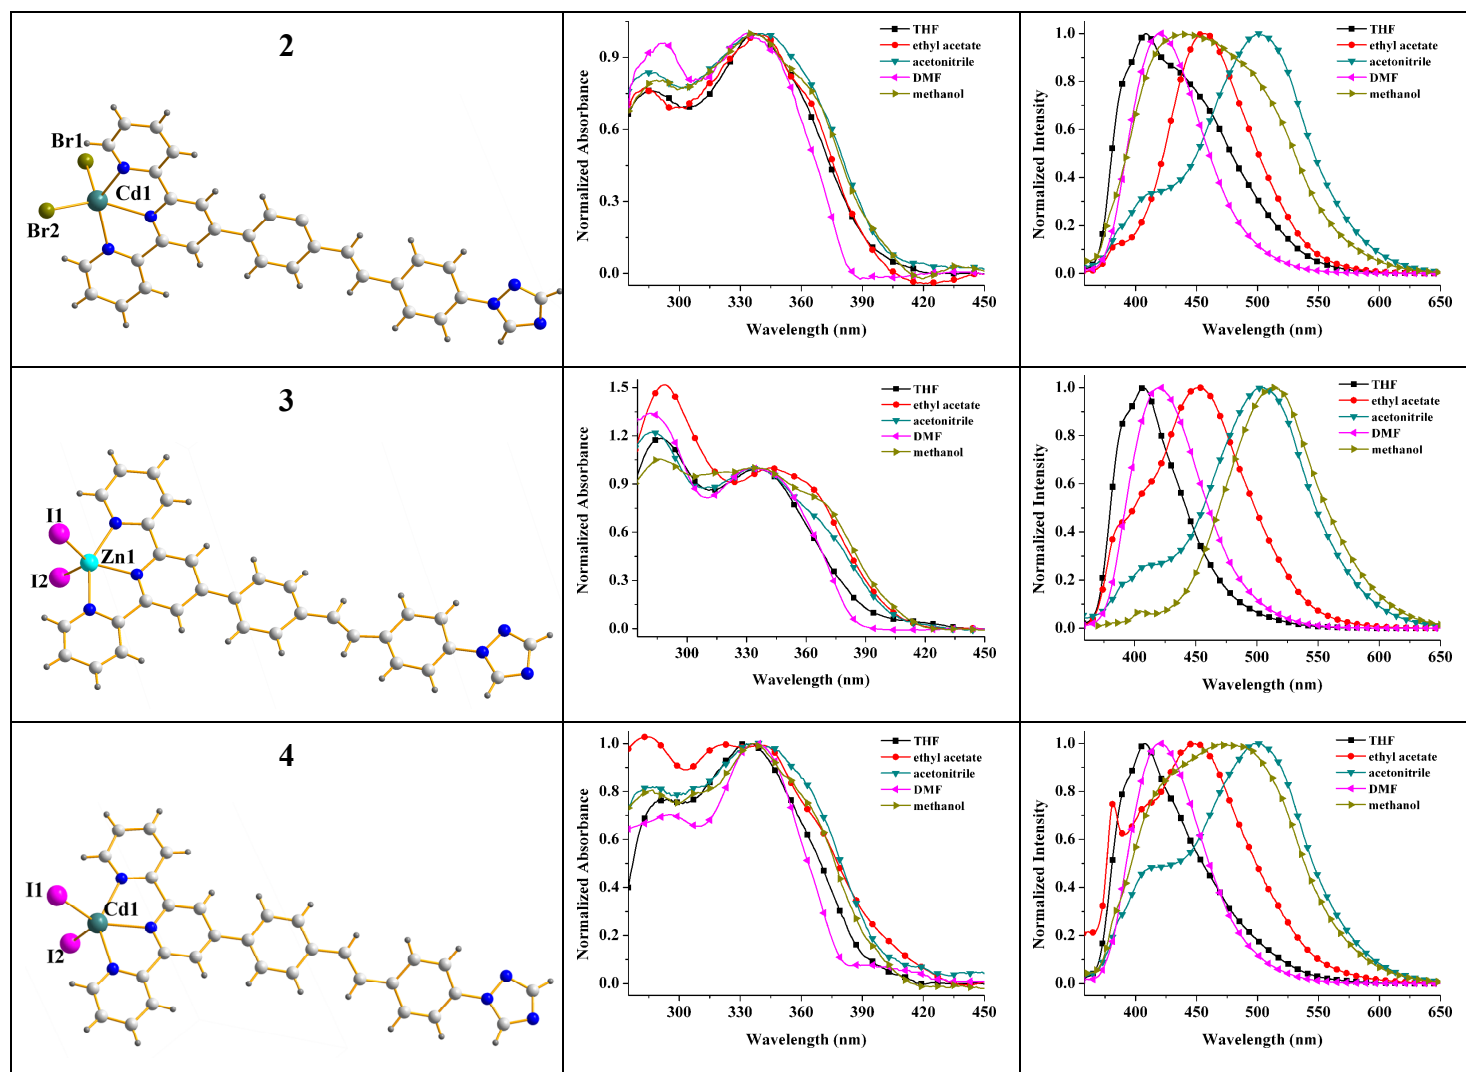

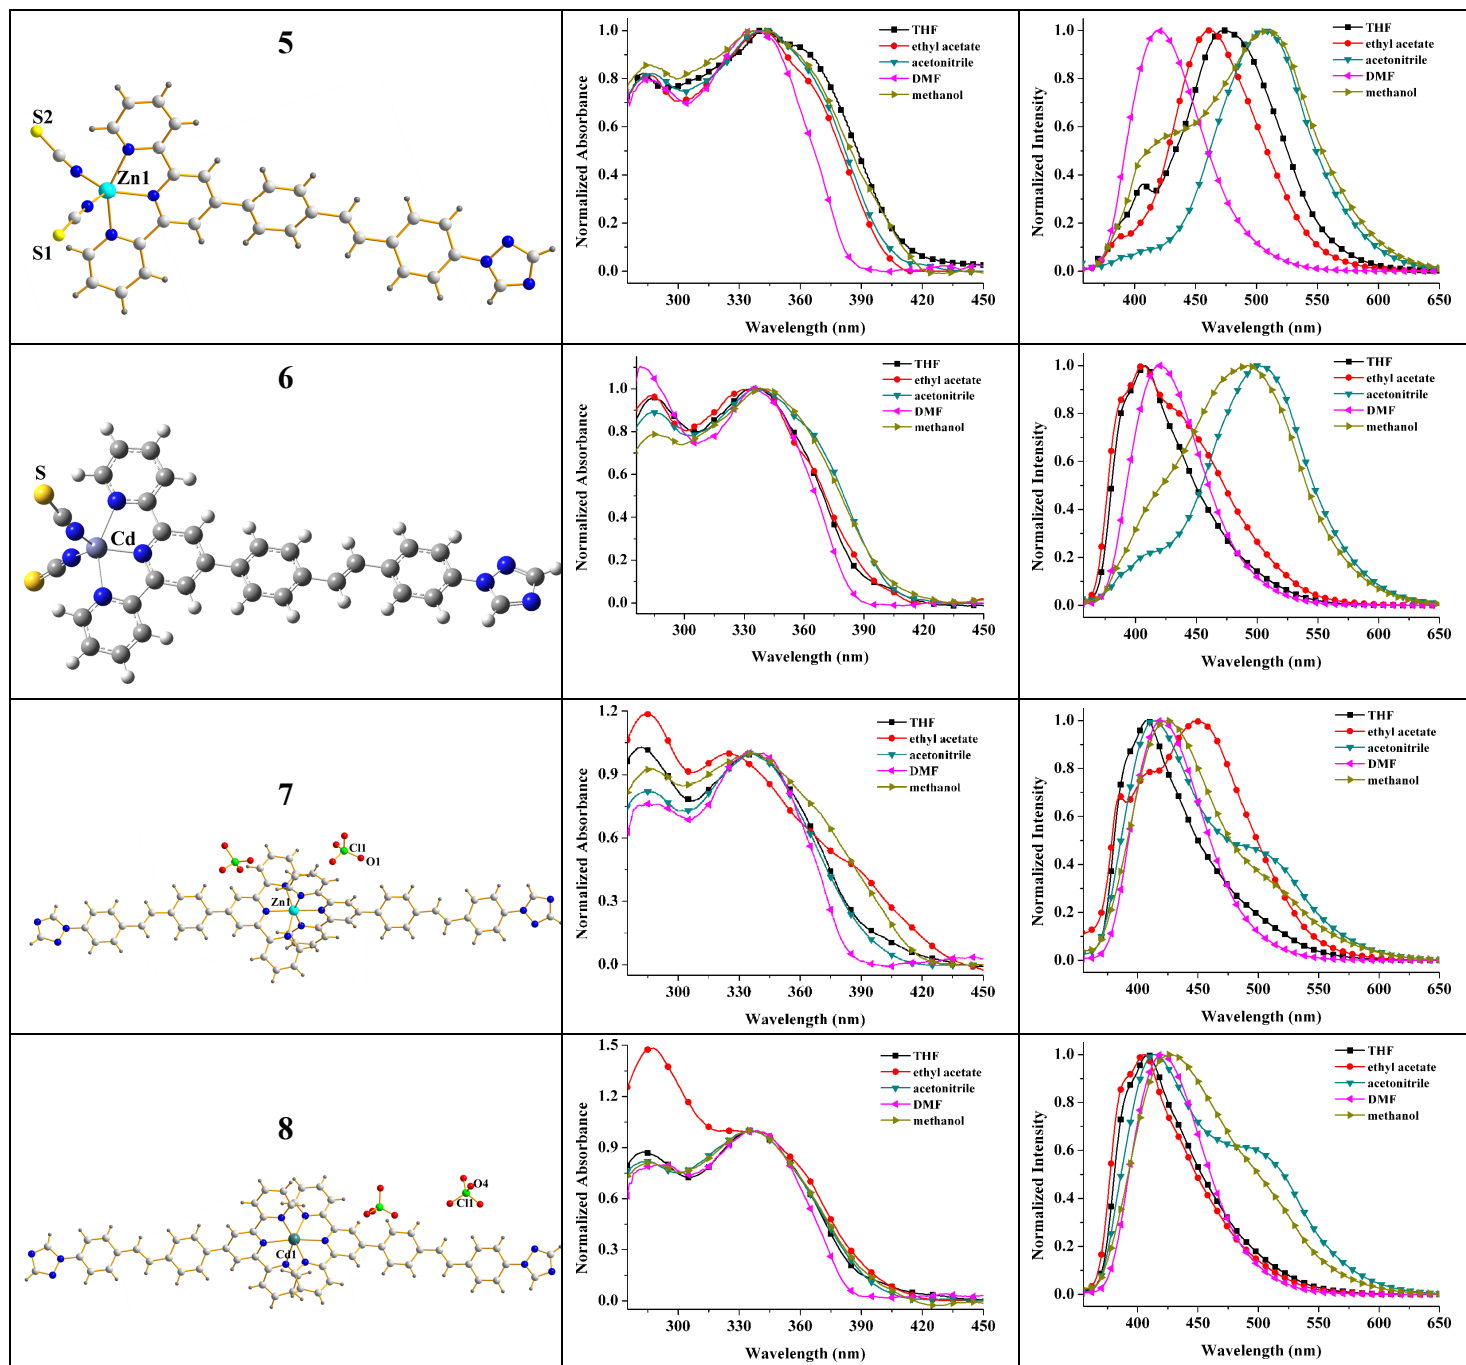

**Fig. S8.** The TPA spectra of complexes **2-8** in DMF under different excitation wavelengths.

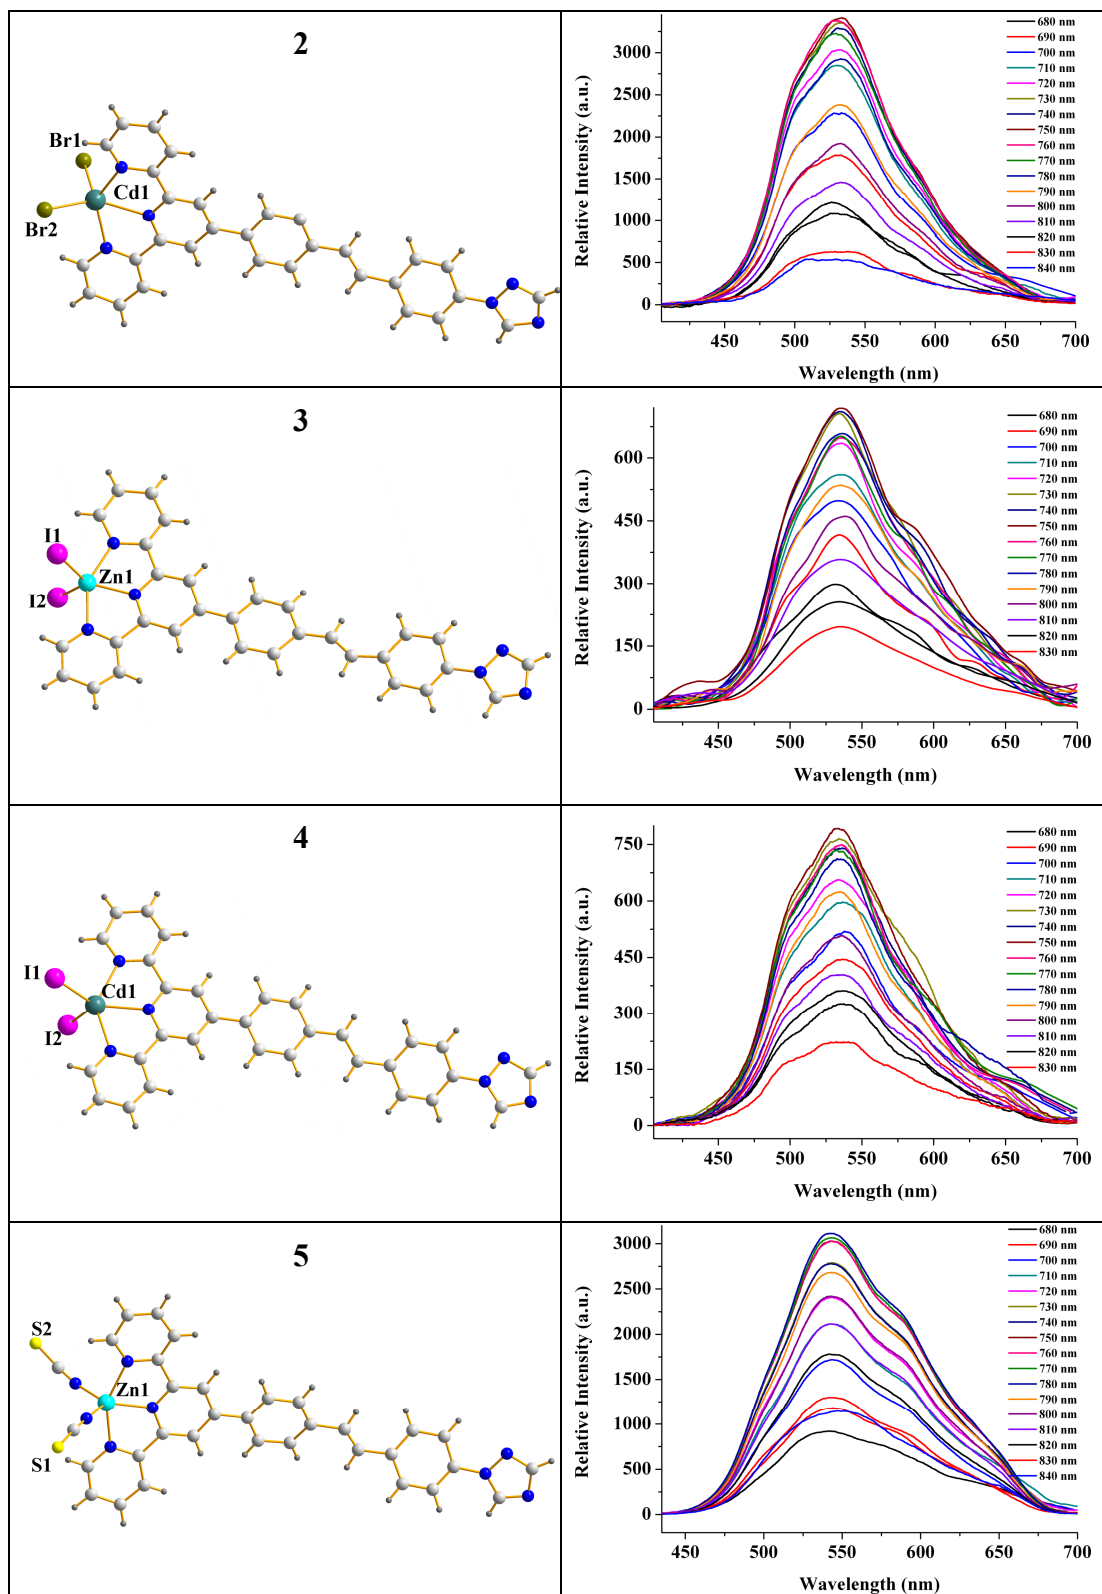

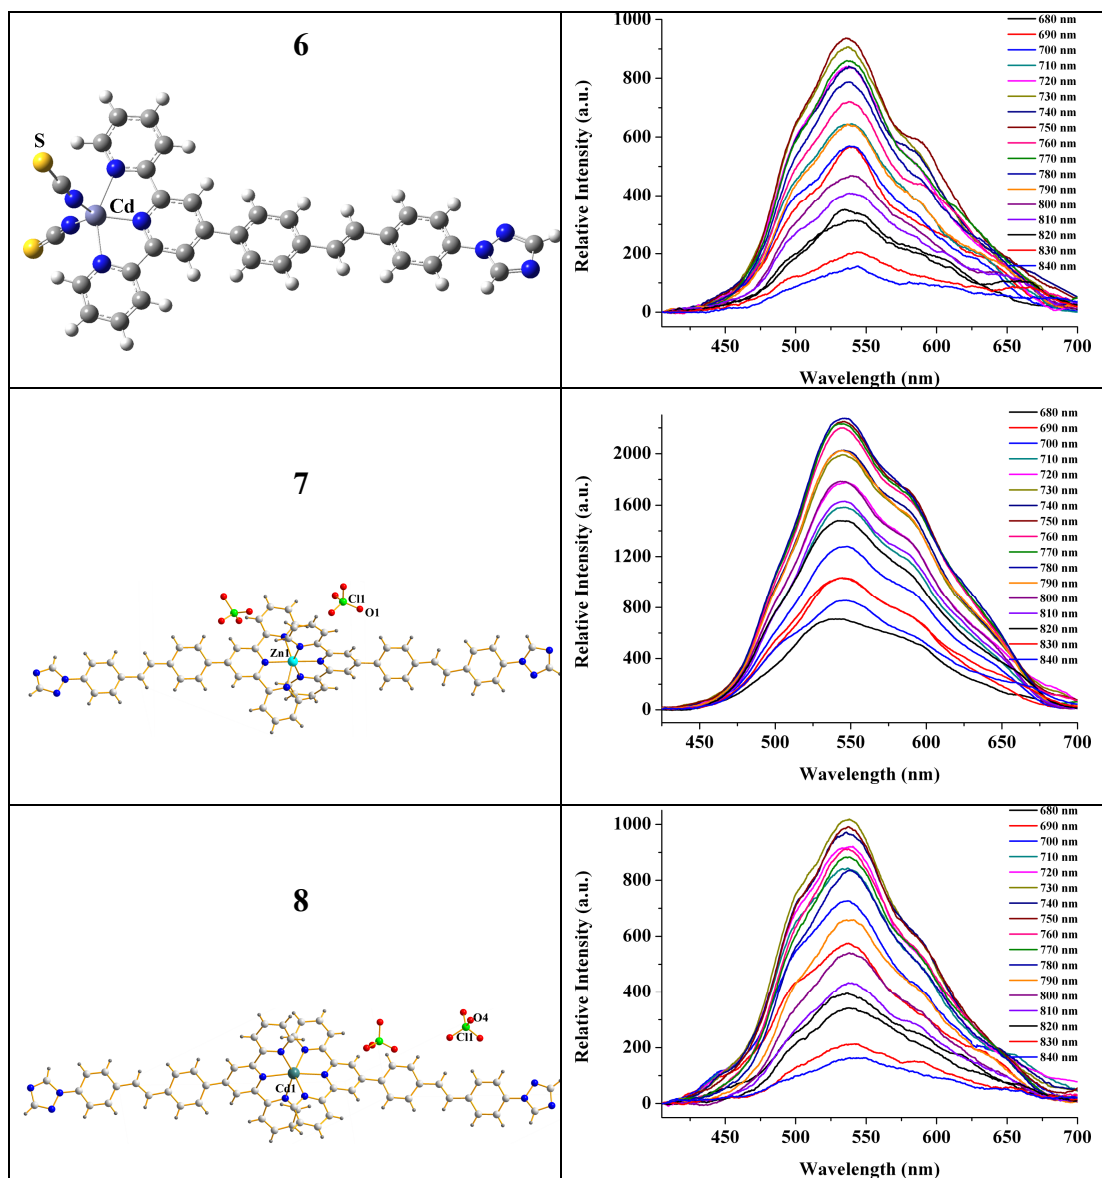

- 1 (a) F. Zordan, L. Brammer and P. Sherwood, *J. Am. Chem. Soc.*, 2005, **127**, 5979;  
(b) M. Fourmigue and P. Auban-Senzier, *Inorg. Chem.*, 2008, **47**, 9979; (c) S. K. Nayak, M. K. Reddy, T. N. G. Row and D. Chopra, *Cryst. Growth Des.*, 2011, **11**, 1578.
- 2 H. Zhang, X. M. Wang, K. Zhang and B. K. Teo, *Coord. Chem. Rev.*, 1999, **183**, 157.
